# Supplementary material for: Modelling the effects of environmental heterogeneity within the lung on the tuberculosis life-cycle
Source: bioRxiv or medRxiv preprint supplement (doi:10.1101/2019.12.12.871269), 2020-06-02
Supplement: Supplementary file [file media-1.pdf]

# Modelling the effects of environmental heterogeneity within the lung on the tuberculosis life-cycle - Supplementary Material

Michael J. Pitcher, Ruth Bowness, Simon Dobson,  
Raluca Eftimie, Stephen H. Gillespie

## A Sensitivity analysis - PRCC values

|                     | Days after initial infection |       |       |       |       |       |       |       |       |        |         |         |
|---------------------|------------------------------|-------|-------|-------|-------|-------|-------|-------|-------|--------|---------|---------|
|                     | 1-10                         | 11-20 | 21-30 | 31-40 | 41-50 | 51-60 | 61-70 | 71-80 | 81-90 | 91-100 | 101-110 | 111-120 |
| $S_V$               | -                            |       |       |       |       |       |       |       |       |        |         |         |
| $S_Q$               | +                            |       | +     | +     | +     | +     | +     | +     | +     | +      | +       | +       |
| $\lambda_R$         | +                            | +     | +     | +     | +     | +     | +     | +     | +     | +      | +       | +       |
| $\lambda_D$         | +                            | +     |       |       | -     | -     | -     |       |       |        |         | +       |
| $\sigma_\lambda$    |                              |       |       |       |       |       |       |       |       |        |         |         |
| $\phi$              | -                            |       |       |       |       |       |       |       |       |        |         |         |
| $\xi$               | +                            | +     |       |       |       |       |       |       |       |        |         |         |
| $\theta_\xi$        |                              |       |       |       |       |       |       |       |       |        |         |         |
| $\sigma_\xi$        | -                            |       | -     |       |       |       |       |       |       |        | -       | -       |
| $\tau_{BY}$         |                              | +     | +     |       |       |       |       |       |       | +      |         |         |
| $\alpha_D$          | -                            | -     | -     |       |       |       |       | -     | -     |        | -       | -       |
| $\beta_D$           | +                            |       |       |       |       |       |       | +     | +     | +      | +       |         |
| $\theta_{\beta_D}$  | -                            |       |       |       |       |       |       |       |       |        |         |         |
| $\mu_{DI}$          | +                            | +     |       |       |       |       |       |       |       |        |         |         |
| $\tau_D$            | +                            | +     |       |       |       |       |       |       |       |        |         |         |
| $\alpha_{MY}$       | +                            | +     |       |       |       |       |       |       |       |        |         |         |
| $\beta_{MY}$        |                              |       |       |       |       |       |       |       |       |        |         |         |
| $\omega$            |                              |       |       |       | +     | +     | -     | -     | -     | -      | -       | -       |
| $\theta_{eMB}$      |                              | -     | -     | -     |       |       |       |       |       |        |         |         |
| $\theta_{eMT}$      | +                            | +     | +     | +     | +     | +     | +     | +     | +     | +      | +       | +       |
| $\mu_{MR}$          | +                            | +     |       |       |       |       |       |       |       |        |         |         |
| $\mu_{MA}$          |                              |       |       | +     | +     |       |       |       |       |        |         |         |
| $\kappa_M$          |                              | -     | -     | -     | -     | -     | -     | -     | -     | -      | -       | -       |
| $\theta_{\kappa_M}$ | +                            | +     | +     | +     | +     | +     | +     | +     | +     | +      | +       | +       |
| $\psi_{\kappa_M}$   | +                            |       |       |       |       |       |       |       |       |        |         |         |
| $\gamma_R$          | +                            | +     |       |       |       |       |       | +     |       |        |         |         |
| $\theta_{\gamma_R}$ | +                            |       |       |       |       |       |       |       |       |        |         |         |
| $\eta$              | +                            | +     | +     |       |       |       |       |       |       |        |         |         |
| $\gamma_A$          |                              | -     | -     | -     |       |       |       |       |       |        |         |         |
| $\theta_{\gamma_A}$ |                              |       |       |       | +     |       |       |       |       |        |         |         |
| $\tau_M$            | -                            | -     | -     | -     | -     | -     | -     | -     | -     | -      | -       | -       |
| $\beta_T$           |                              | +     | +     | +     | +     | +     | +     | +     | +     | +      | +       | +       |
| $\theta_{\beta_T}$  |                              |       |       |       |       |       |       |       |       |        |         |         |
| $\epsilon_T$        | -                            | -     | -     | -     | -     | -     | -     | -     | -     | -      | -       | -       |
| $\epsilon_T$        | +                            | +     | +     | +     | +     | +     | +     | +     | +     | +      | +       | +       |
| $\tau_T$            | -                            | -     | -     | -     | -     | -     | -     | -     | -     | -      | -       | -       |
| $\lambda_T$         | +                            | +     | +     | +     | +     | +     | +     | +     | +     | +      | +       | +       |
| $\mu_{TN}$          | +                            | +     | +     |       |       |       |       |       |       |        |         |         |
| $\mu_{TA}$          | +                            | +     | +     | +     |       |       |       |       |       |        | +       | +       |

Table A1: Parameter effects on average lesion size ( $\Omega_S$ ) over the course of infection. + denotes the parameter has a significant, positive PRCC value for the lesion size in the 10 day period, whilst - denotes the parameter has a significant, negative PRCC value for the lesion size. Where no symbol is present, the PRCC value is non-significant.

|                        | Days after initial infection |       |       |       |       |       |       |       |       |        |         |         |
|------------------------|------------------------------|-------|-------|-------|-------|-------|-------|-------|-------|--------|---------|---------|
|                        | 1-10                         | 11-20 | 21-30 | 31-40 | 41-50 | 51-60 | 61-70 | 71-80 | 81-90 | 91-100 | 101-110 | 111-120 |
| $S_Q$                  |                              |       |       |       | +     | +     | +     | +     |       |        |         |         |
| $S_G$                  | +/-                          | -     | -     | +     | +     | +     | +     | +     | +     | +      | +       | +       |
| $\lambda_R$            |                              |       | +     | +     | +     | +     | +     | +     | +     | +      | +       | +       |
| $\lambda_I$            |                              |       | -     | -     |       |       |       |       |       |        |         |         |
| $\sigma_\lambda$       |                              |       | -     | -     |       |       |       |       |       |        |         |         |
| $\phi$                 |                              | +     | +     | +     | +     | +     | +     | +     | +     |        |         |         |
| $\xi$                  |                              |       |       |       |       |       |       |       |       |        |         |         |
| $\theta_\xi$           | +                            | +     |       |       |       |       |       |       |       |        |         |         |
| $\theta_\xi$           |                              | -     |       |       |       |       |       |       |       |        |         |         |
| $\lambda_D$            | -                            |       | +     | +     | +     |       |       |       |       |        |         |         |
| $\theta_{\tau BY}$     | +                            |       | -     | -     |       |       |       |       |       |        |         |         |
| $\alpha_D$             | -                            | -     | -     | -     |       |       |       |       | -     | -      | -       | -       |
| $\beta_D$              |                              |       |       |       |       |       |       |       |       | +      | +       |         |
| $\theta_{\beta D}$     |                              |       |       |       | +     | +     |       |       |       |        |         |         |
| $\mu_{DI}$             | -                            | +     | +     |       |       |       |       |       |       |        |         |         |
| $\mu_{DM}$             | +                            | +     |       |       |       |       |       |       |       |        |         |         |
| $\gamma_D$             | +                            |       |       |       |       |       |       |       |       |        |         |         |
| $\theta_{\gamma D}$    | -                            |       |       |       |       |       |       |       |       |        |         |         |
| $\tau_D$               | +                            |       |       |       |       |       |       |       |       |        |         |         |
| $\beta_{ML}$           | +                            | +     | +     |       |       |       |       |       |       |        |         |         |
| $\beta_{MY}$           |                              |       |       |       |       | -     | -     | -     |       |        |         |         |
| $\theta_{\beta MY}$    |                              | -     |       |       |       |       |       |       |       |        |         |         |
| $\theta_{\epsilon MB}$ | +                            |       |       |       |       |       |       |       |       |        |         |         |
| $\epsilon_{MT}$        |                              |       | -     | -     |       |       |       |       |       |        |         |         |
| $\theta_{\epsilon MT}$ |                              |       | +     | +     | +     | +     | +     | +     | +     | +      | +       | +       |
| $\mu_{MR}$             |                              |       | +     | +     | +     | +     | +     | +     | +     | +      | +       | +       |
| $\zeta$                | -                            |       |       |       |       |       |       |       |       |        |         |         |
| $\kappa_M$             |                              |       |       |       |       |       |       |       |       |        |         |         |
| $\theta_{\kappa M}$    | -                            |       | +     | +     | +     | +     | +     | +     | +     | +      | +       | +       |
| $\psi_{\kappa M}$      |                              |       |       |       |       |       |       |       |       |        |         |         |
| $\theta_{\gamma R}$    | +                            | +     | +     | +     | +     | +     | +     | +     | -     |        |         |         |
| $\eta$                 | +                            |       |       |       |       |       |       |       |       |        |         |         |
| $\gamma_A$             | +                            |       | -     | -     | -     | -     | -     | -     | -     | -      | -       | -       |
| $\theta_{\gamma A}$    | -                            |       |       |       |       |       |       |       |       |        |         |         |
| $\tau_M$               | +                            | -     | -     | -     | -     | -     | -     | -     | -     | -      | -       | -       |
| $\alpha_T$             | +                            | +     |       |       |       |       |       |       |       |        |         |         |
| $\beta_T$              | -                            | -     |       |       |       |       |       |       |       |        |         |         |
| $\theta_{\beta T}$     | -                            |       |       |       |       |       |       |       |       |        |         |         |
| $\epsilon_T$           |                              |       |       |       |       |       |       |       |       |        |         |         |
| $\theta_{\epsilon T}$  | +                            | +     | +     | +     | +     | +     | +     | +     | +     | +      | +       | +       |
| $\tau_T$               |                              |       |       |       |       |       |       |       |       |        |         |         |
| $\sigma_T$             |                              |       |       | +     | +     | +     | +     | +     | +     | +      | +       | +       |
| $\lambda_T$            |                              |       | -     | -     | -     | -     | -     | -     | -     | -      | -       | -       |
| $\mu_{TN}$             |                              |       | +     | +     | +     | +     | +     |       |       |        |         |         |
| $\mu_{TA}$             | -                            |       |       |       |       |       |       |       |       |        |         | +       |

Table A2: Parameter effects on number of lesions ( $\Omega_N$ ) over the course of infection. + denotes the parameter has a significant, positive PRCC value for the number of lesions in the 10 day period, - denotes the parameter has a significant, negative PRCC value for the number of lesions, and +/- denotes both positive and negative PRCC values exist. Where no symbol is present, the PRCC value is non-significant.

|                          | Days after initial infection |       |       |       |       |       |       |       |       |        |         |         |
|--------------------------|------------------------------|-------|-------|-------|-------|-------|-------|-------|-------|--------|---------|---------|
|                          | 1-10                         | 11-20 | 21-30 | 31-40 | 41-50 | 51-60 | 61-70 | 71-80 | 81-90 | 91-100 | 101-110 | 111-120 |
| $S_V$                    | -                            |       |       |       |       |       |       |       |       |        |         |         |
| $S_Q$                    | +                            |       | +     | +     | +     | +     | +     | +     | +     | +      | +       | +       |
| $S_G$                    |                              |       |       | +     |       |       |       |       |       |        |         |         |
| $\lambda_R$              | +                            | +     |       | +     | +     | +     | +     | +     | +     | +      | +       | +       |
| $\lambda_D$              | +                            |       |       |       | +     | +     | +     | +     | +     | +      | +       | +       |
| $\lambda_I$              | +                            | +     |       |       | -     | -     | -     | -     | -     | -      | -       | -       |
| $\sigma_\lambda$         |                              |       |       |       |       |       |       |       |       |        |         |         |
| $\phi$                   | -                            |       | +     | +     | +     | +     |       |       |       |        |         |         |
| $\xi$                    | +                            | +     | +     |       |       |       |       |       |       |        |         |         |
| $\theta_\xi$             |                              |       | -     |       |       |       |       |       |       |        |         | -       |
| $\sigma_\xi$             | -                            |       | -     |       |       |       |       |       |       |        |         |         |
| $\tau_{BY}$              |                              | +     | +     | +     |       |       |       |       | +     | +      | +       |         |
| $\theta_{\tau_{BY}}$     | -                            | -     | -     |       |       |       |       |       |       |        |         |         |
| $\alpha_D$               | +                            |       |       |       |       |       |       |       | -     | -      | -       | -       |
| $\beta_D$                | +                            |       | +     |       |       |       |       | +     | +     | +      | +       | +       |
| $\theta_{\beta_D}$       | -                            | -     |       |       |       |       |       |       |       |        |         |         |
| $\mu_{DI}$               | +                            | +     | +     |       |       |       |       |       |       |        |         |         |
| $\mu_{DM}$               |                              |       |       |       |       |       |       | -     | -     | -      | -       | -       |
| $\tau_D$                 | +                            |       | -     | -     | -     | -     | -     | -     | -     | -      | -       | -       |
| $\alpha_{MY}$            | +                            | +     |       |       |       |       |       |       |       |        |         |         |
| $\beta_{MY}$             |                              |       |       |       |       |       |       |       |       |        |         |         |
| $\theta_{\epsilon_{MB}}$ | -                            | -     | -     |       |       |       |       |       |       |        |         |         |
| $\theta_{\epsilon_{MT}}$ | +                            | +     | +     | +     | +     | +     | +     | +     | +     | +      | +       | +       |
| $\mu_{MR}$               | +                            | +     | +     | +     | +     | +     | +     | +     | +     | +      | +       | +       |
| $\mu_{MA}$               |                              |       |       | +     | +     | +     |       |       |       |        |         |         |
| $\kappa_M$               | -                            | -     | -     | -     | -     | -     | -     | -     | -     | -      | -       | -       |
| $\theta_{\kappa_M}$      | +                            | +     | +     | +     | +     | +     | +     | +     | +     | +      | +       | +       |
| $\psi_{\kappa_M}$        | +                            |       |       |       |       |       |       |       |       |        |         |         |
| $\gamma_R$               | +                            | +     |       |       |       |       |       |       |       |        |         |         |
| $\theta_{\gamma_R}$      | +                            |       |       | +     |       |       |       | +     |       |        |         | +       |
| $\eta$                   | +                            | +     | +     |       |       |       |       |       |       |        |         |         |
| $\gamma_A$               | -                            | -     | -     | -     | -     | -     | -     | -     | -     | -      | -       | -       |
| $\tau_M$                 | -                            | -     | -     | -     | -     | -     | -     | -     | -     | -      | -       | -       |
| $\beta_T$                |                              |       | +     | +     | +     | +     | +     | +     | +     | +      | +       | +       |
| $\theta_{\beta_T}$       |                              |       |       |       |       |       |       |       |       |        |         |         |
| $\epsilon_T$             | -                            | -     | -     | -     | -     | -     | -     | -     | -     | -      | -       | -       |
| $\theta_{\epsilon_T}$    | +                            | +     | +     | +     | +     | +     | +     | +     | +     | +      | +       | +       |
| $\tau_T$                 | -                            | -     | -     | -     | -     | -     | -     | -     | -     | -      | -       | -       |
| $\lambda_T$              |                              |       |       |       |       |       |       |       |       |        |         |         |
| $\mu_{TN}$               | +                            | +     | +     | +     | +     |       |       |       |       |        |         |         |
| $\mu_{TA}$               | +                            | +     | +     |       |       |       |       |       |       |        | +       | +       |

Table A3: Parameter effects on total number of bacteria ( $\Omega_T$ ) over the course of infection. + denotes the parameter has a significant, positive PRCC value for the total bacteria numbers in the 10 day period, whilst - denotes the parameter has a significant, negative PRCC value for the total bacteria numbers. Where no symbol is present, the PRCC value is non-significant.

## B Sensitivity analysis - PRCC plots

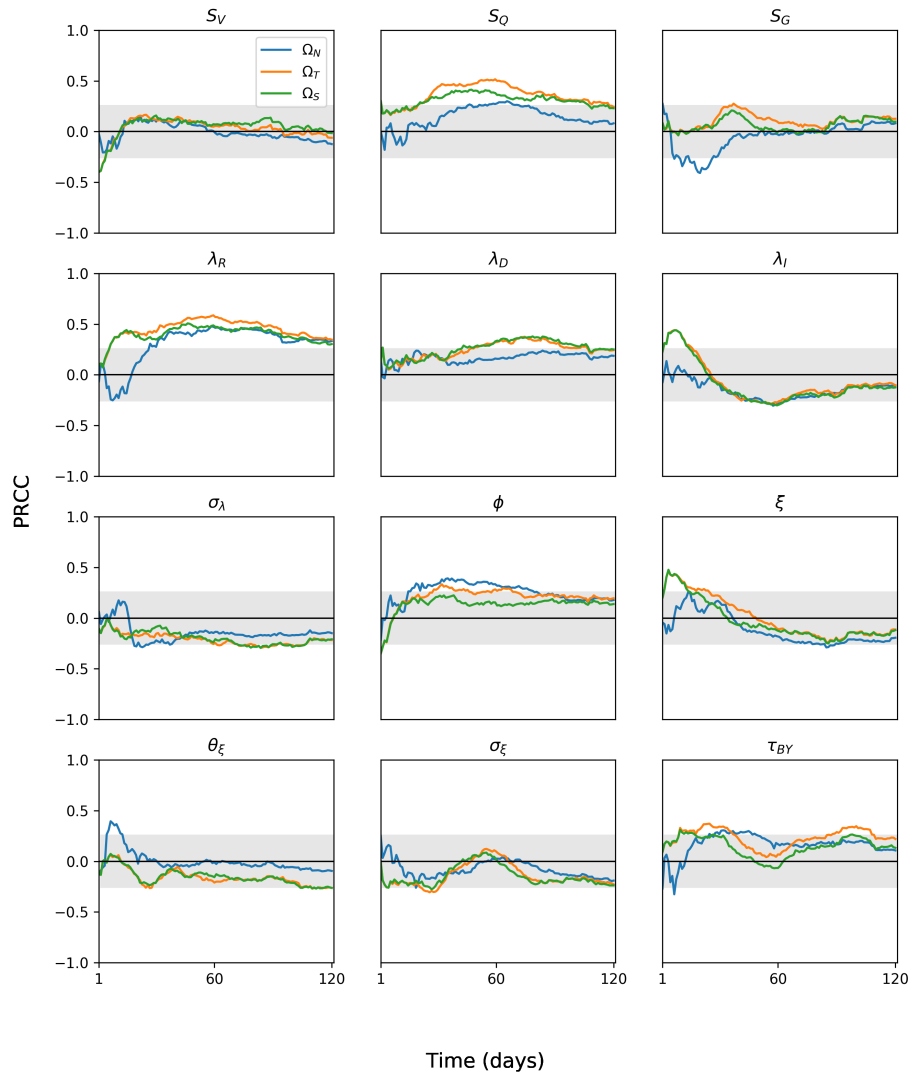

Figure B1: Sensitivity plots for various parameters within *TBMetaPopPy*, plotting the PRCC value of the parameter against the three outputs over time. Grey shaded area shows non-significance ( $p < 0.01$ ).

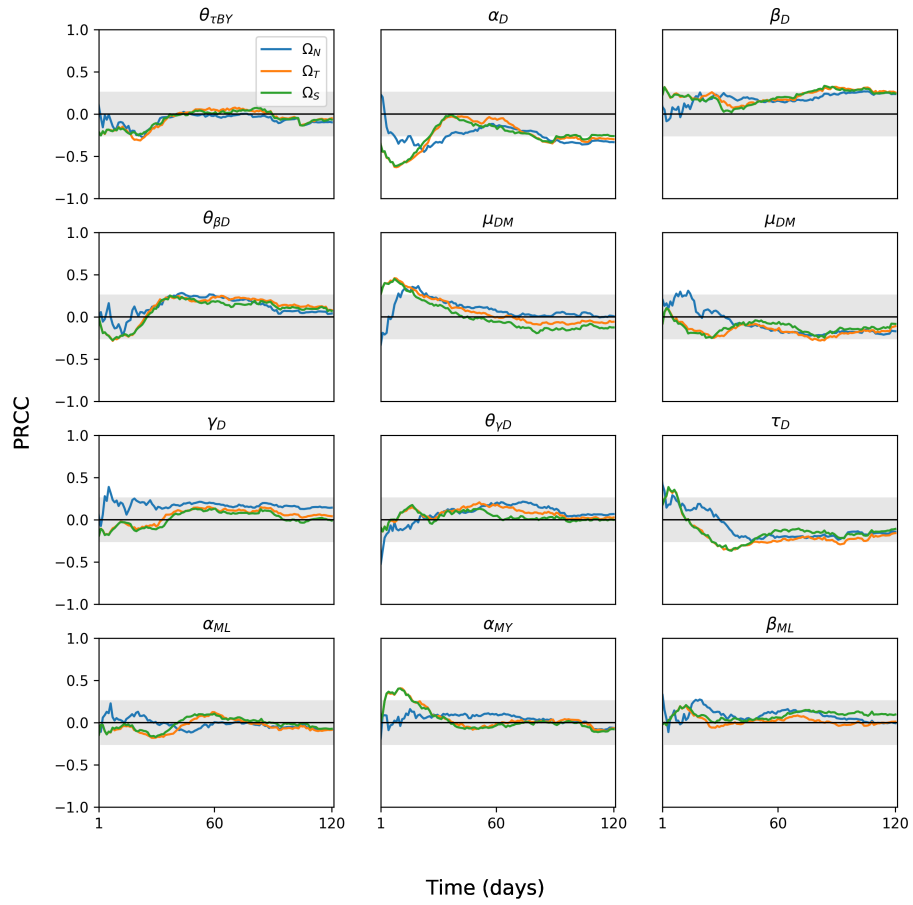

Figure B2: Sensitivity plots for various parameters within *TBMetaPopPy*, plotting the PRCC value of the parameter against the three outputs over time. Grey shaded area shows non-significance ( $p < 0.01$ ).

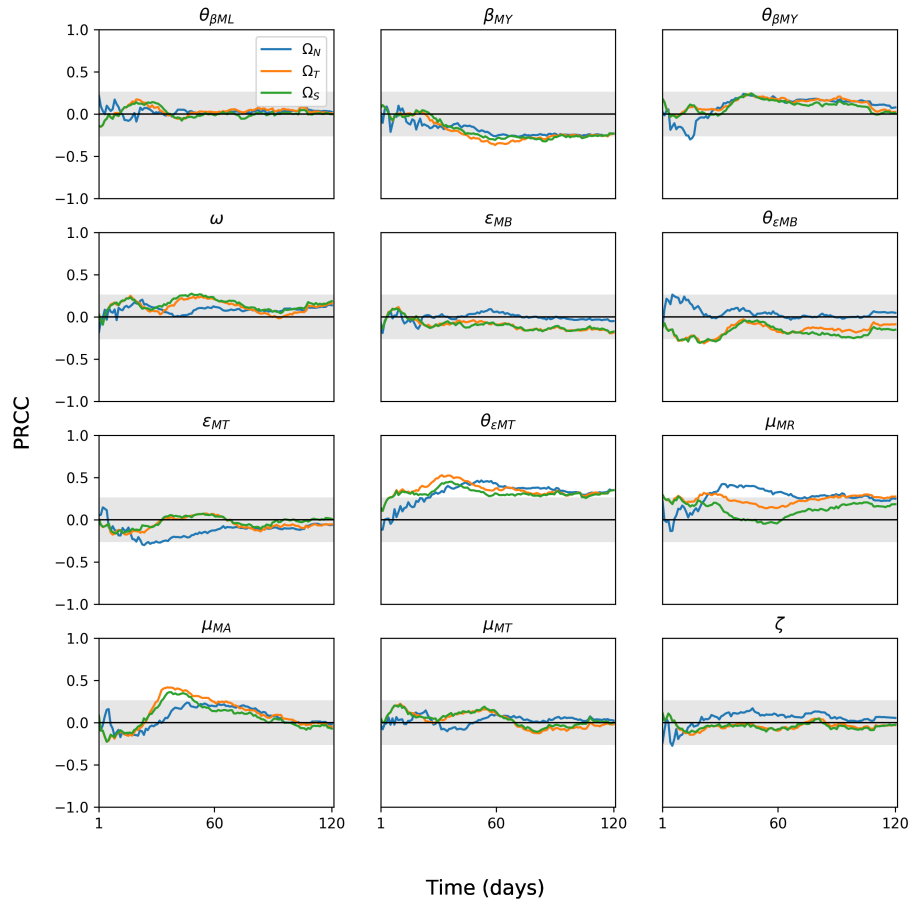

Figure B3: Sensitivity plots for various parameters within *TBMetaPopPy*, plotting the PRCC value of the parameter against the three outputs over time. Grey shaded area shows non-significance ( $p < 0.01$ ).

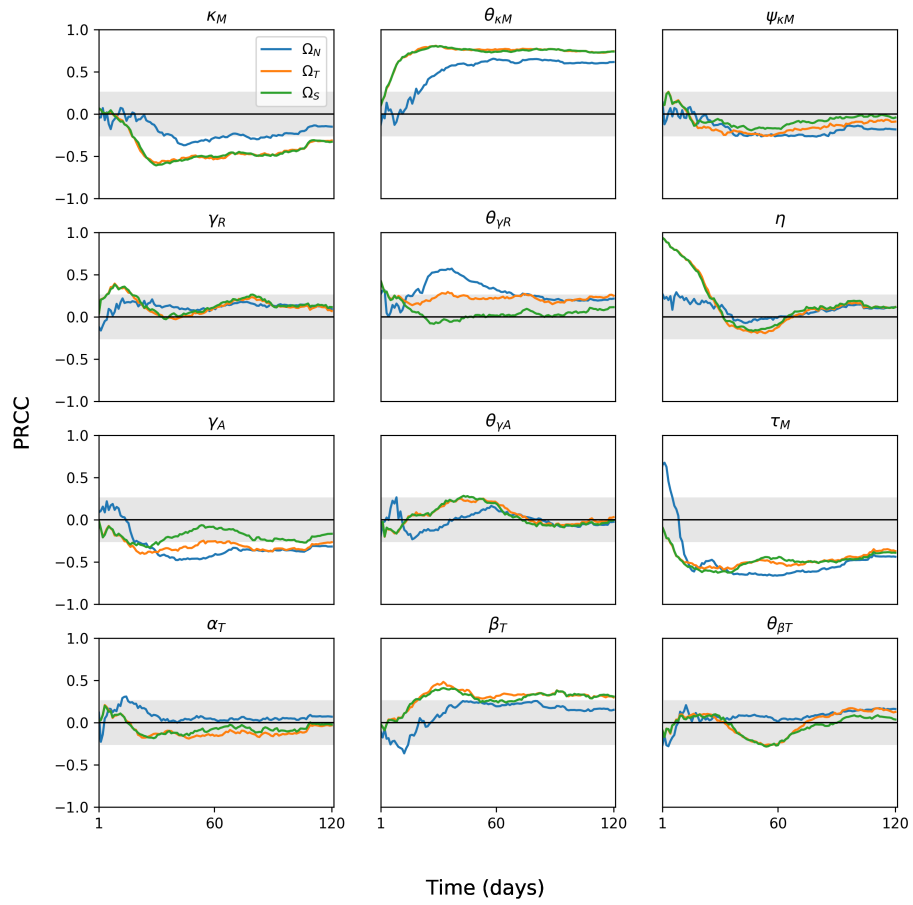

Figure B4: Sensitivity plots for various parameters within *TBMetaPopPy*, plotting the PRCC value of the parameter against the three outputs over time. Grey shaded area shows non-significance ( $p < 0.01$ ).

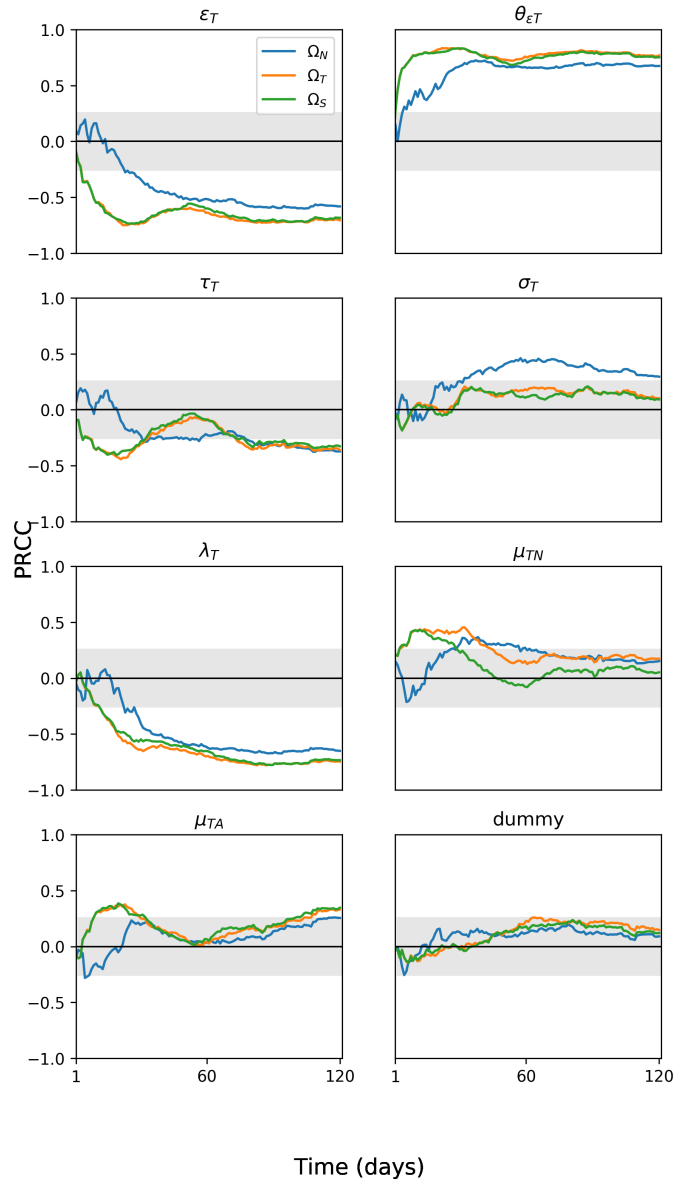

Figure B5: Sensitivity plots for various parameters within *TBMetapopPy*, plotting the PRCC value of the parameter against the three outputs over time. Grey shaded area shows non-significance ( $p < 0.01$ ).
